# Supplementary material for: Effects of ambient exposure on photoluminescence of Dion–Jacobson tin-based halide perovskites
Source: Royal Society of Chemistry journal article supplement (doi:10.1039/d2tc04912k), 2023-01-01
Supplement: d2tc04912k1.pdf [file d2tc04912k1.pdf]

# Effects of ambient exposure on photoluminescence of Dion-Jacobson tin-based halide perovskite

Wen Ting Sun,<sup>1#</sup> Zengshan Xing,<sup>2#</sup> Aleksandr Sergeev,<sup>2</sup> Yanling He,<sup>1</sup> Alan Man Ching Ng,<sup>3</sup> Kam Sing Wong,<sup>2</sup> Lidiya Molčanov,<sup>4</sup> Jasminka Popović<sup>4,\*</sup> and Aleksandra B. Djurišić<sup>1,\*</sup>

<sup>1</sup> Department of Physics, The University of Hong Kong, Pokfulam Road, Hong Kong

<sup>2</sup> Department of Physics, Hong Kong University of Science and Technology, Clearwater Bay, Hong Kong

<sup>3</sup> Core Characterization Facility, Southern University of Science and Technology, No. 1088, Xueyuan Rd., Shenzhen, 518055, Guangdong, PR China.

<sup>4</sup> Ruđer Bošković Institute, Bijenička 54, Zagreb, Croatia

#These authors contributed equally.

## SUPPLEMENTARY INFORMATION

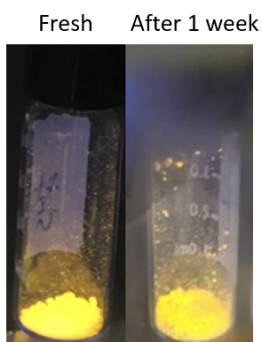

**Figure S1.** Photos of HDASnBr<sub>4</sub> powder under UV lamp, freshly prepared (left) and after 1 week in ambient (right).

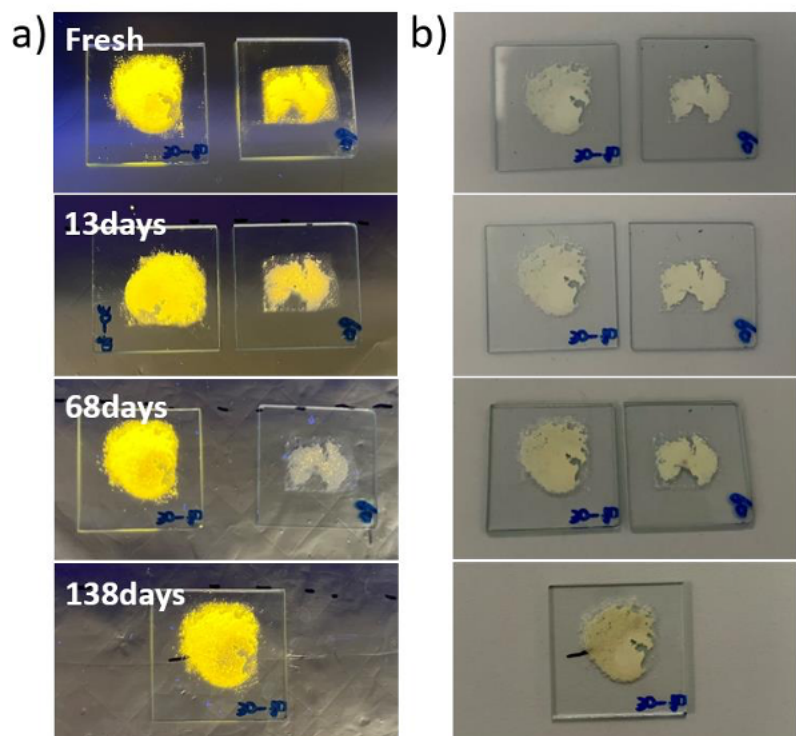

**Figure S2.** Photos of HDASnBr<sub>4</sub> powder under a) UV lamp b) ambient light at different levels of RH (30-40% RH left, 55-62%RH right) for different times of ambient exposure. The photo at 138 days includes only the sample exposed to ambient at 30-40% RH as the sample exposed to higher humidity already degraded by day 68.

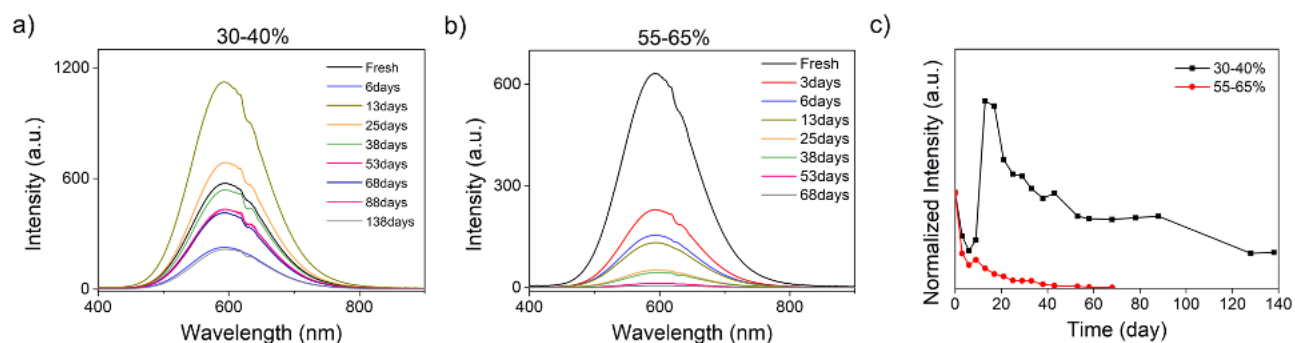

**Figure S3.** PL spectra of HDASnBr<sub>4</sub> powder for different times of ambient exposure at a) 30-40% RH b) 52-62% RH; c) Normalized PL intensity of HDASnBr<sub>4</sub> powder as a function of time for different relative humidity levels.

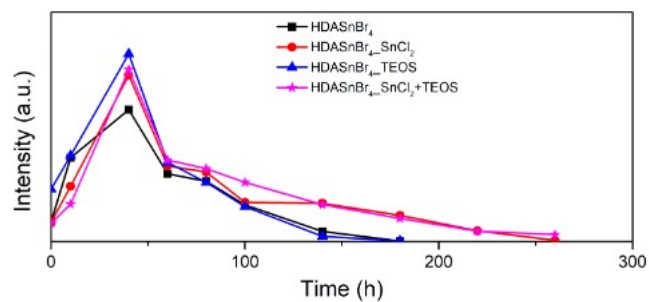

**Figure S4.** PL intensity of HDASnBr<sub>4</sub> samples with different additives as a function of time of exposure to ambient at RH of ~32-40%.

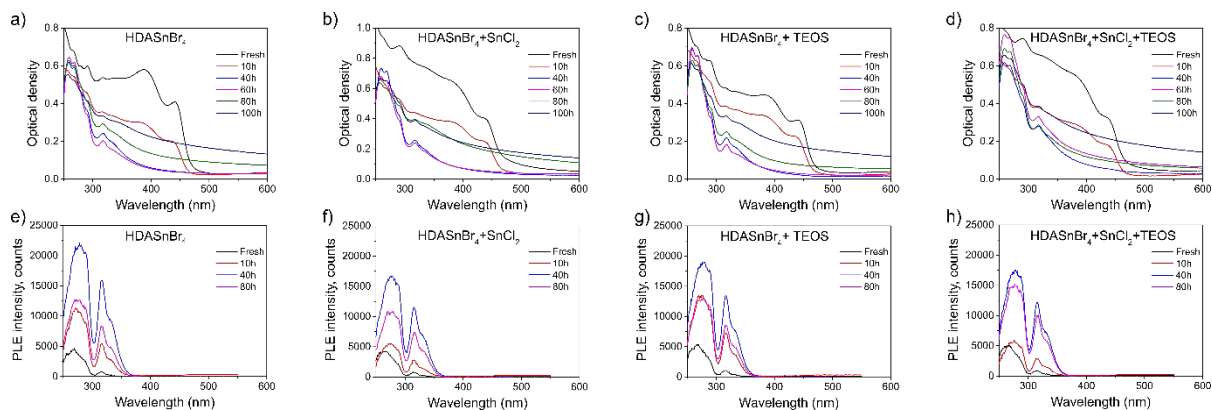

**Figure S5.** Optical density (a-d) and PLE (e-h) spectra of the samples prepared in DMF:DMSO=3:1, and exposed to ambient atmosphere with RH in the range of ~32-40% highlighting the changes in optical properties during aging.

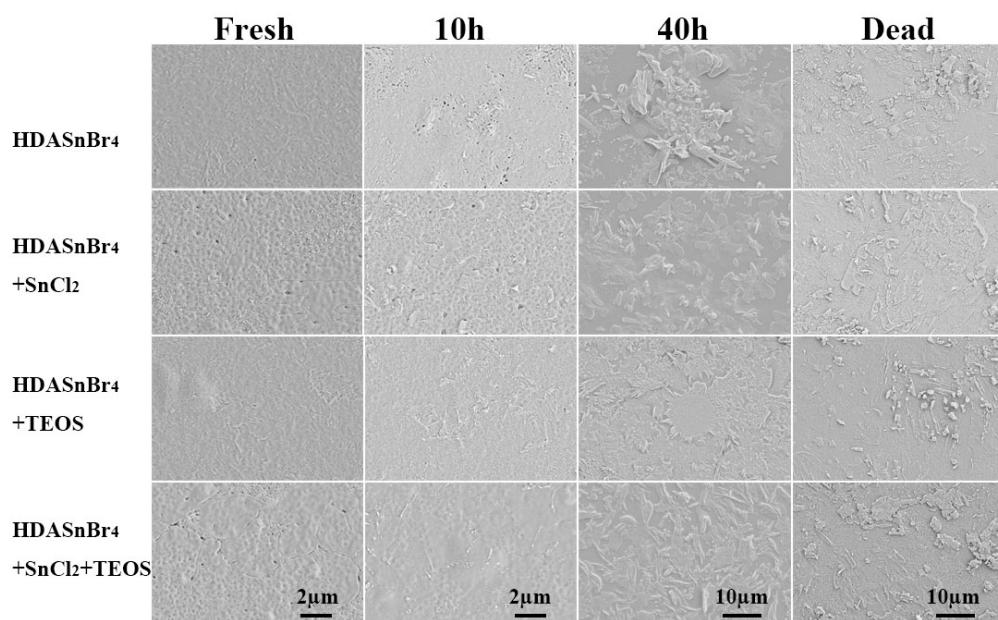

**Figure S6.** SEM images of HDASnBr<sub>4</sub> samples with different additives for different times of ambient exposure.

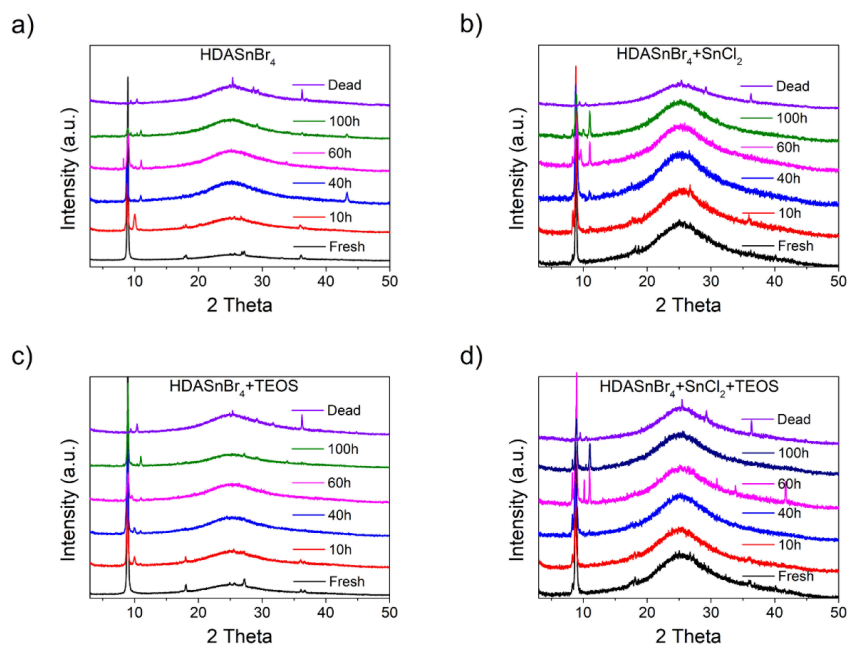

**Figure S7.** XRD patterns of HDASnBr<sub>4</sub> samples with different additives: a) no additive, b) 10%SnCl<sub>2</sub>, c) 7.5%TEOS, and d) SnCl<sub>2</sub>+TEOS for different times of ambient exposure. Films were prepared in DMF:DMSO=3:1, and exposed to ambient atmosphere with RH in the range of ~32-40%.

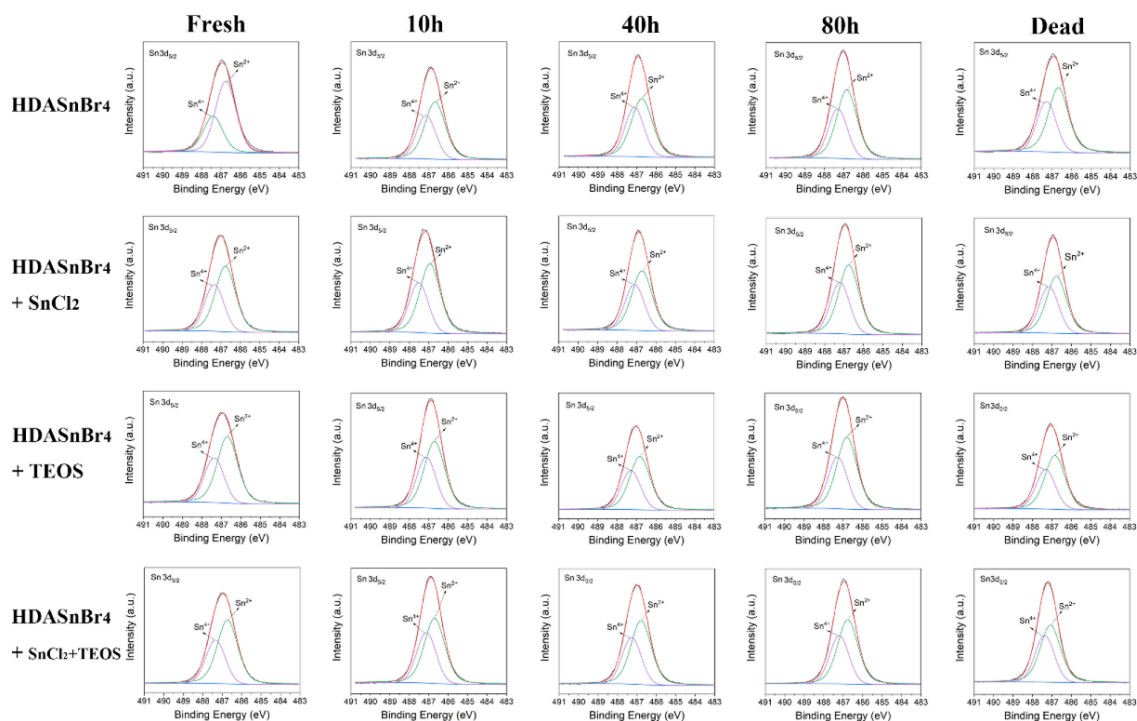

**Figure S8.** XPS spectra of Sn 3d<sub>5/2</sub> of HDASnBr<sub>4</sub> samples with different additives for different times of ambient exposure.

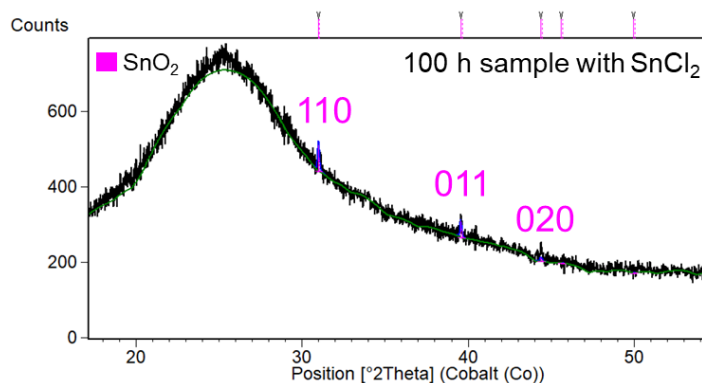

**Figure S9.** An enlarged part of XRD pattern of sample with 10% SnCl<sub>2</sub> aged for 100 h in ambient.

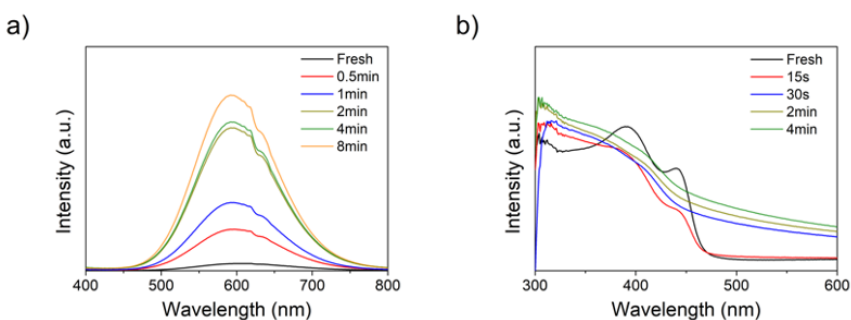

**Figure S10.** a) PL spectra and b) absorption spectra of HDASnBr<sub>4</sub> for different time of exposure for DMF vapor.

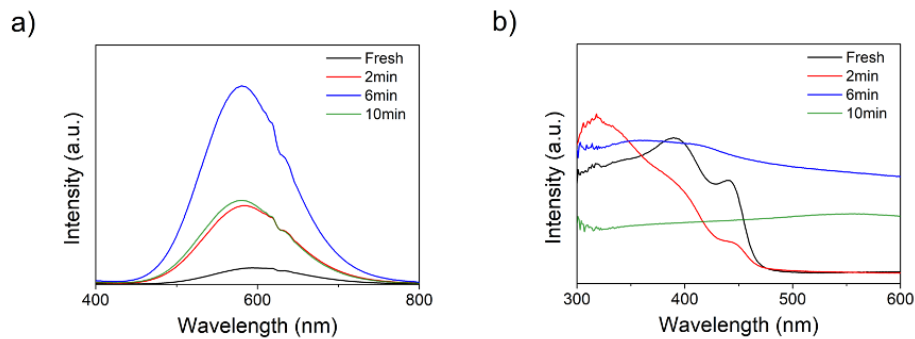

**Figure S11.** a) PL spectra and b) absorption spectra of HDASnBr<sub>4</sub> for different time of exposure for methanol vapor.

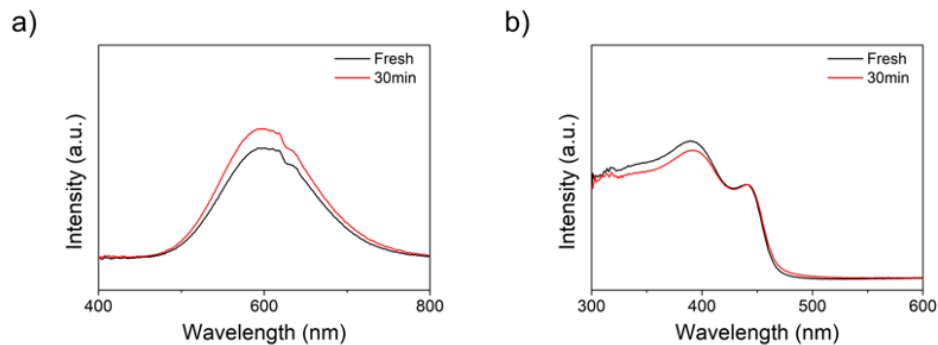

**Figure S12.** a) PL spectra and b) absorption spectra of HDASnBr<sub>4</sub> for different time of exposure for toluene vapor.

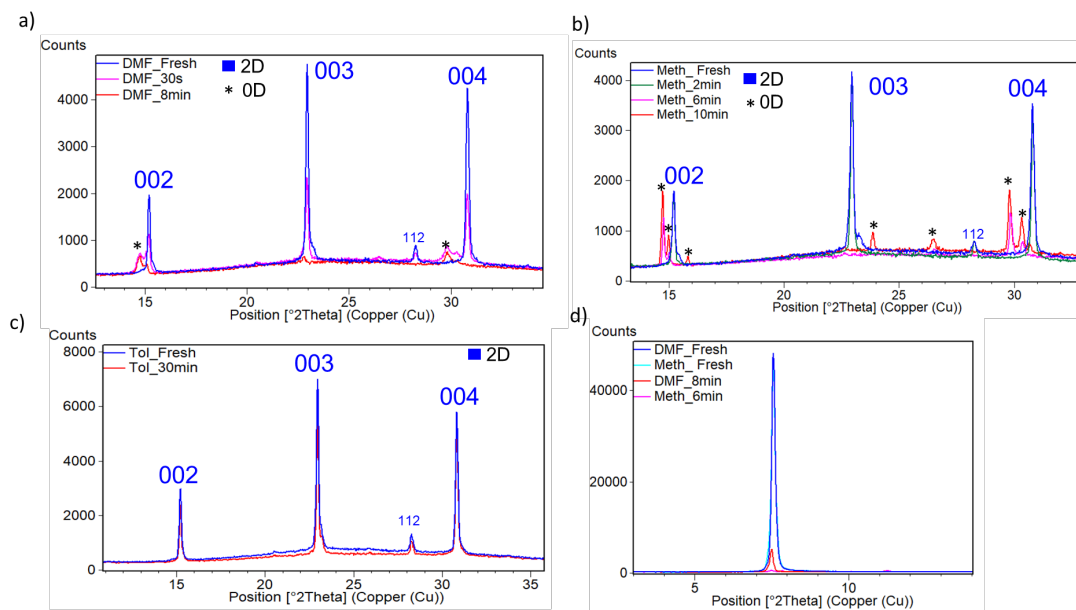

**Figure S13.** XRD patterns of HDASnBr<sub>4</sub> films exposed to a) DMF, b) methanol, and c) toluene vapors d) low angle part of XRD patterns for samples exposed to DMF and methanol
